# Supplementary material for: Encapsulation of labile trivalent lanthanides into a homobimetallic chromium(iii)-containing triple-stranded helicate. Synthesis, characterization, and divergent intramolecular energy transfers
Source: Royal Society of Chemistry journal article supplement (doi:10.1039/b602392d), 2006-01-01
Supplement: b602392d.pdf [file b602392d.pdf]

**Electronic Supplementary Information for Dalton Transactions**

**This journal is © The Royal Society of Chemistry 2006**

**Encapsulation of labile trivalent lanthanides into a homobimetallic chromium(III)-containing triple-stranded helicate. Synthesis, characterization and divergent intramolecular energy transfers**

---

Martine Cantuel, Frédéric Gummy, Jean-Claude G. Bünzli,<sup>\*</sup> and Claude Piguet<sup>\*</sup>

### **Supporting Information**

(12 pages)

Table S1 Elemental analyses (%C, %H, %N), synthetic yields ( $\eta$ ) and molecular weights ( $MW$ ) for  $[\text{ZnLnZn}(\text{L}2)_3](\text{CF}_3\text{SO}_3)_7(\text{H}_2\text{O})_n$  (Ln = La, Eu, Gd, Tb, Lu) and  $[\text{CrLnCr}(\text{L}2)_3](\text{CF}_3\text{SO}_3)_9(\text{H}_2\text{O})_n(^n\text{Bu}_4\text{NCF}_3\text{SO}_3)_p$ .

| Complexes                                                                                                                     | %C            | %H          | %N            | $\eta$ / % | $MW$ / $\text{g}\cdot\text{mol}^{-1}$ |
|-------------------------------------------------------------------------------------------------------------------------------|---------------|-------------|---------------|------------|---------------------------------------|
| $[\text{ZnLaZn}(\text{L}2)_3](\text{CF}_3\text{SO}_3)_7(\text{H}_2\text{O})_5$                                                | 50.09 (50.13) | 3.91 (3.66) | 12.01 (12.06) | 70         | 3833.16                               |
| $[\text{ZnEuZn}(\text{L}2)_3](\text{CF}_3\text{SO}_3)_7(\text{H}_2\text{O})_7$                                                | 49.67 (49.50) | 3.86 (3.71) | 11.87 (11.91) | 71         | 3882.25                               |
| $[\text{ZnGdZn}(\text{L}2)_3](\text{CF}_3\text{SO}_3)_7(\text{H}_2\text{O})_8$                                                | 49.21 (49.20) | 3.87 (3.74) | 11.78 (11.84) | 74         | 3905.55                               |
| $[\text{ZnTbZn}(\text{L}2)_3](\text{CF}_3\text{SO}_3)_7(\text{H}_2\text{O})_6$                                                | 49.63 (49.64) | 3.92 (3.67) | 11.88 (11.94) | 82         | 3871.19                               |
| $[\text{ZnLuZn}(\text{L}2)_3](\text{CF}_3\text{SO}_3)_7(\text{H}_2\text{O})_6$                                                | 49.48 (49.44) | 3.84 (3.66) | 11.90 (11.89) | 73         | 3887.24                               |
| $[\text{CrLaCr}(\text{L}2)_3](\text{CF}_3\text{SO}_3)_9(\text{H}_2\text{O})_{12}(^n\text{Bu}_4\text{NCF}_3\text{SO}_3)_{0.1}$ | 46.10 (46.18) | 3.88 (3.71) | 10.91 (10.90) | 78         | 4254.86                               |
| $[\text{CrEuCr}(\text{L}2)_3](\text{CF}_3\text{SO}_3)_9(\text{H}_2\text{O})_8(^n\text{Bu}_4\text{NCF}_3\text{SO}_3)_{0.1}$    | 46.67 (46.69) | 3.66 (3.58) | 11.02 (11.01) | 88         | 4210.77                               |
| $[\text{CrGdCr}(\text{L}2)_3](\text{CF}_3\text{SO}_3)_9(\text{H}_2\text{O})_9(^n\text{Bu}_4\text{NCF}_3\text{SO}_3)_{0.3}$    | 46.55 (46.54) | 3.67 (3.69) | 10.83 (10.82) | 78         | 4312.38                               |
| $[\text{CrTbCr}(\text{L}2)_3](\text{CF}_3\text{SO}_3)_9(\text{H}_2\text{O})_7(^n\text{Bu}_4\text{NCF}_3\text{SO}_3)_{0.3}$    | 46.86 (46.82) | 3.65 (3.63) | 10.99 (10.92) | 86         | 4270.81                               |
| $[\text{CrLuCr}(\text{L}2)_3](\text{CF}_3\text{SO}_3)_9(\text{H}_2\text{O})_{10}(^n\text{Bu}_4\text{NCF}_3\text{SO}_3)_{0.3}$ | 46.06 (46.15) | 3.73 (3.70) | 10.68 (10.73) | 80         | 4348.11                               |

Table S2 Lifetimes of  $\text{Eu}({}^5\text{D}_0)$ ,  $\text{Cr}({}^2\text{E})$  and  $\text{Tb}({}^5\text{D}_4)$  excited levels (ms) in  $[\text{CrGdCr}(\text{L}2)_3](\text{CF}_3\text{SO}_3)_9(\text{H}_2\text{O})_9(^n\text{Bu}_4\text{NCF}_3\text{SO}_3)_{0.3}$ ,  $[\text{CrGd}(\text{L}1)_3](\text{CF}_3\text{SO}_3)_5(\text{H}_2\text{O})_6$ <sup>13</sup>  $[\text{ZnEuZn}(\text{L}2)_3](\text{CF}_3\text{SO}_3)_7(\text{H}_2\text{O})_7$ ,  $[\text{ZnEu}(\text{L}3)_3](\text{ClO}_4)_5(\text{H}_2\text{O})_4$ <sup>32</sup>  $[\text{ZnEu}(\text{L}1)_3](\text{CF}_3\text{SO}_3)_4(\text{ClO}_4)(\text{CH}_3\text{CN})_4$ <sup>33</sup>  $[\text{CrEuCr}(\text{L}2)_3](\text{CF}_3\text{SO}_3)_9(\text{H}_2\text{O})_8$   $(^n\text{Bu}_4\text{NCF}_3\text{SO}_3)_{0.1}$ ,  $[\text{CrEu}(\text{L}1)_3](\text{CF}_3\text{SO}_3)_5(\text{H}_2\text{O})_4$ <sup>13</sup>  $[\text{ZnTbZn}(\text{L}2)_3](\text{CF}_3\text{SO}_3)_7(\text{H}_2\text{O})_6$  and  $[\text{CrTbCr}(\text{L}2)_3](\text{CF}_3\text{SO}_3)_9(\text{H}_2\text{O})_7(^n\text{Bu}_4\text{NCF}_3\text{SO}_3)_{0.3}$  in the solid-state and in solution under various excitation conditions (analysing wavelengths set at the maximum of the  $\text{Eu}({}^5\text{D}_0 \rightarrow {}^7\text{F}_2)$ ,  $\text{Tb}({}^5\text{D}_4 \rightarrow {}^7\text{F}_5)$  or  $\text{Cr}({}^2\text{E} \rightarrow {}^4\text{A}_2)$  transitions).

| T / K        | Compd                               | $\bar{\nu}_{\text{exc}} / \text{cm}^{-1}$ | $\bar{\nu}_{\text{an}} / \text{cm}^{-1}$ | $\tau$ (ms)                          | Reference |
|--------------|-------------------------------------|-------------------------------------------|------------------------------------------|--------------------------------------|-----------|
| 10           | $[\text{CrGdCr}(\text{L}2)_3]^{9+}$ | 21468                                     | 13245                                    | 2.27(1) $\text{Cr}({}^2\text{E})$    | This work |
| 295          |                                     | 21468                                     | 13316                                    | 0.031(1) $\text{Cr}({}^2\text{E})$   | This work |
| 10           | $[\text{CrGd}(\text{L}1)_3]^{6+}$   | 21322                                     | 13301                                    | 3.62(1) $\text{Cr}({}^2\text{E})$    | 13        |
| 295          |                                     | 21322                                     | 13348                                    | 0.19(1) $\text{Cr}({}^2\text{E})$    | 13        |
| 10           | $[\text{ZnEuZn}(\text{L}2)_3]^{7+}$ | 28169                                     | 16152                                    | 1.94(2) $\text{Eu}({}^5\text{D}_0)$  | This work |
|              |                                     | 23810                                     | 16152                                    | 1.96(1) $\text{Eu}({}^5\text{D}_0)$  | This work |
|              |                                     | 21468                                     | 16152                                    | 2.022(6) $\text{Eu}({}^5\text{D}_0)$ | This work |
|              |                                     | 17218                                     | 16152                                    | 2.05(8) $\text{Eu}({}^5\text{D}_0)$  | This work |
| <sup>a</sup> |                                     | 28169                                     | 16298                                    | 2.21(5) $\text{Eu}({}^5\text{D}_0)$  | This work |
| 295          |                                     | 23810                                     | 16152                                    | 0.69(4) $\text{Eu}({}^5\text{D}_0)$  | This work |
|              |                                     | 21468                                     | 16152                                    | 0.683(2) $\text{Eu}({}^5\text{D}_0)$ | This work |
| <sup>a</sup> |                                     | 28169                                     | 16298                                    | 1.48(1) $\text{Eu}({}^5\text{D}_0)$  | This work |
| 10           | $[\text{ZnEu}(\text{L}3)_3]^{5+}$   | 25000                                     | 16152                                    | 1.96(7) $\text{Eu}({}^5\text{D}_0)$  | 32        |
| 10           | $[\text{ZnEu}(\text{L}1)_3]^{5+}$   | 17235                                     | 16152                                    | 2.53(1) $\text{Eu}({}^5\text{D}_0)$  | 32        |
| 295          |                                     | 17241                                     | 16152                                    | 1.67(2) $\text{Eu}({}^5\text{D}_0)$  | 33        |
| 10           | $[\text{CrEuCr}(\text{L}2)_3]^{9+}$ | 28169                                     | 13245                                    | 2.08(2) $\text{Cr}({}^2\text{E})$    | This work |

|              |                                          |       |       |                                              |           |
|--------------|------------------------------------------|-------|-------|----------------------------------------------|-----------|
|              |                                          | 28169 | 16155 | 0.196(1) Eu( <sup>5</sup> D <sub>0</sub> )   | This work |
|              |                                          | 24390 | 13228 | 2.10(1) Cr( <sup>2</sup> E)                  | This work |
|              |                                          | 24390 | 16152 | 0.20(1) Eu( <sup>5</sup> D <sub>0</sub> )    | This work |
| <sup>a</sup> |                                          | 28169 | 13228 | 3.1(1) Cr( <sup>2</sup> E)                   | This work |
| <sup>a</sup> |                                          | 28169 | 16155 | 0.24(1) Eu( <sup>5</sup> D <sub>0</sub> )    | This work |
| 295          |                                          | 28169 | 13316 | 0.033(1) Cr( <sup>2</sup> E)                 | This work |
|              |                                          | 28169 | 16155 | 0.095(2) Eu( <sup>5</sup> D <sub>0</sub> )   | This work |
|              |                                          | 24390 | 13245 | 0.030(1) Cr( <sup>2</sup> E)                 | This work |
|              |                                          | 24390 | 16152 | 0.101(5) Eu( <sup>5</sup> D <sub>0</sub> )   | This work |
| <sup>a</sup> |                                          | 28169 | 13228 | 0.012(1) Cr( <sup>2</sup> E)                 | This work |
| <sup>a</sup> |                                          | 28169 | 16155 | 0.076(1) Eu( <sup>5</sup> D <sub>0</sub> )   | This work |
| 10           | [CrEu(L1) <sub>3</sub> ] <sup>6+</sup>   | 28329 | 13301 | 3.46(1) Cr( <sup>2</sup> E)                  | 13        |
|              |                                          | 28329 | 16218 | 0.55(4) Eu( <sup>5</sup> D <sub>0</sub> )    | 13        |
| 295          |                                          | 28329 | 13348 | 0.09(1) Cr( <sup>2</sup> E)                  | 13        |
|              |                                          | 28329 | 16218 | 0.59(1) Eu( <sup>5</sup> D <sub>0</sub> )    | 13        |
| 10           | [ZnTbZn(L2) <sub>3</sub> ] <sup>7+</sup> | 28169 | 18375 | 1.3(1) Tb( <sup>5</sup> D <sub>4</sub> )     | This work |
|              |                                          | 23810 | 18375 | 1.67(6) Tb( <sup>5</sup> D <sub>4</sub> )    | This work |
|              |                                          | 20492 | 18375 | 1.54(4) Tb( <sup>5</sup> D <sub>4</sub> )    | This work |
| 10           | [CrTbCr(L2) <sub>3</sub> ] <sup>9+</sup> | 28169 | 13228 | 1.8(2) Cr( <sup>2</sup> E)                   | This work |
|              |                                          | 28169 | 18375 | 0.00175(4) Tb( <sup>5</sup> D <sub>4</sub> ) | This work |
| 295          |                                          | 28169 | 13228 | 0.106(3) Cr( <sup>2</sup> E)                 | This work |
|              |                                          | 28169 | 18375 | <sup>b</sup>                                 | This work |

<sup>a</sup> 10<sup>-3</sup> mol·dm<sup>-3</sup> in acetonitrile. <sup>b</sup> Not detected.

Table S3 Longitudinal  $^1\text{H}$  nuclear relaxation times for the aromatic protons H1-H12 in  $[\text{ZnTbZn}(\text{L}2)_3]^{7+}$  ( $T_{li}^{\text{exp}}$ ) and in  $[\text{ZnLuZn}(\text{L}2)_3]^{7+}$  ( $T_{li}^{\text{dia}}$ ), and computed paramagnetic relaxation times ( $T_{li}^{\text{para}}$ , eq 11) and Tb...H distances ( $r_i^{\text{ZnTbZn,solution}}$ , eq 13) in  $\text{CD}_3\text{CN}$  at 293 K.

| Proton <sup>a</sup> | $\delta_{\text{Hi}}^{\text{exp}}$ /ppm <sup>b</sup> | $T_{li}^{\text{exp}}$ /ms | $T_{li}^{\text{dia}}$ /ms | $T_{li}^{\text{para}}$ /ms | $r_i^{\text{ZnEu,solid}}$ /Å <sup>c</sup> | $r_i^{\text{ZnTbZn,solution}}$ /Å <sup>d</sup> |
|---------------------|-----------------------------------------------------|---------------------------|---------------------------|----------------------------|-------------------------------------------|------------------------------------------------|
| H1                  | 3.62                                                | 2.72E+02                  | 1.62E+03                  | 3.26E+02                   | 11.8                                      | 11.8                                           |
| H2                  | 5.33                                                | 3.68E+02                  | 9.62E+02                  | 5.95E+02                   | 12.4                                      | 13.0                                           |
| H3                  | 3.22                                                | 1.38E+02                  | 1.01E+03                  | 1.60E+02                   | 10.7                                      | 10.4                                           |
| H4                  | 4.38                                                | 1.36E+02                  | 1.04E+03                  | 1.56E+02                   | 8.7                                       | 10.4                                           |
| H5                  | 0.42                                                | 2.80E+01                  | 8.20E+02                  | 3.08E+01                   | 7.6                                       | 7.9                                            |
| H6                  | -12.55                                              | 1.13E+01                  | 2.09E+03                  | 1.13E+01                   | <b>6.7</b>                                | <b>6.7</b>                                     |
| H7                  | 7.44                                                | 1.82E+01                  | 3.07E+02                  | 1.86E+01                   | 7.5                                       | 7.3                                            |
| H7'                 | 4.09                                                | 1.00E+01                  | 3.07E+02                  | 1.04E+01                   | 6.3                                       | 6.6                                            |
| H8                  | -49.0                                               | 3.64E-01                  | 2.05E+03                  | 3.64E-01                   | 3.8                                       | 3.8                                            |
| H9                  | 4.34                                                | 1.63E+01                  | 8.78E+02                  | 1.65E+01                   | 7.4                                       | 7.2                                            |
| H10                 | 8.63                                                | 1.22E+01                  | 1.05E+03                  | 1.23E+01                   | 7.0                                       | 6.8                                            |
| H11                 | 15.98                                               | 3.49E+00                  | 9.62E+02                  | 3.51E+00                   | 5.5                                       | 5.5                                            |
| H12                 | 15.43                                               | 7.45E+00                  | 9.62E+02                  | 7.51E+00                   | 6.3                                       | 6.3                                            |

<sup>a</sup> For the numbering scheme, see Figure 4. <sup>b</sup> Chemical shifts with respect to TMS for  $[\text{ZnTbZn}(\text{L}2)_3]^{7+}$ . <sup>c</sup> Eu...H distances measured in the crystal structure of  $[\text{ZnEu}(\text{L}1)_3](\text{CF}_3\text{SO}_3)_4(\text{ClO}_4)(\text{CH}_3\text{CN})_4$ .<sup>33</sup> <sup>d</sup> Computed with eq. 13 by using  $r_{\text{H}6}^{\text{ZnEu,solid}} = 6.7 \text{ \AA}$  as reference.

Table S4 Lifetimes of the ligand-centred  $^3\pi\pi^*$  excited levels in  $[\text{ZnGdZn}(\text{L}2)_3]^{7+}$  and  $[\text{CrGdCr}(\text{L}2)_3]^{9+}$ .

| Complex | $T / \text{K}$ | $\lambda_{\text{exc}} / \text{nm}$ | $\lambda_{\text{an}} / \text{nm}$ | $\tau_1 / \text{ms}$ | $\tau_2 / \text{ms}$ |
|---------|----------------|------------------------------------|-----------------------------------|----------------------|----------------------|
| ZnGdZn  | 10             | 355                                | 530                               | 2.45 (86 %)          | 0.49 (14 %)          |
|         | 295            | 355                                | 610                               | 0.042 (64 %)         | 0.006 (36 %)         |
| CrGdCr  | 77             | 274                                | 475                               | 1.58 (63 %)          | 0.12 (37 %)          |
|         |                |                                    | 538                               | 1.59 (49 %)          | 0.12 (51 %)          |
|         | 295            | 365                                | 416                               | 0.18 (29 %)          | 0.011 (71 %)         |
|         |                |                                    | 437                               | 0.23 (22 %)          | 0.012 (78 %)         |
|         |                |                                    | 470                               | 0.012 (78 %)         | 0.011 (84 %)         |

a) La:Zn:L2 = 1:0:3

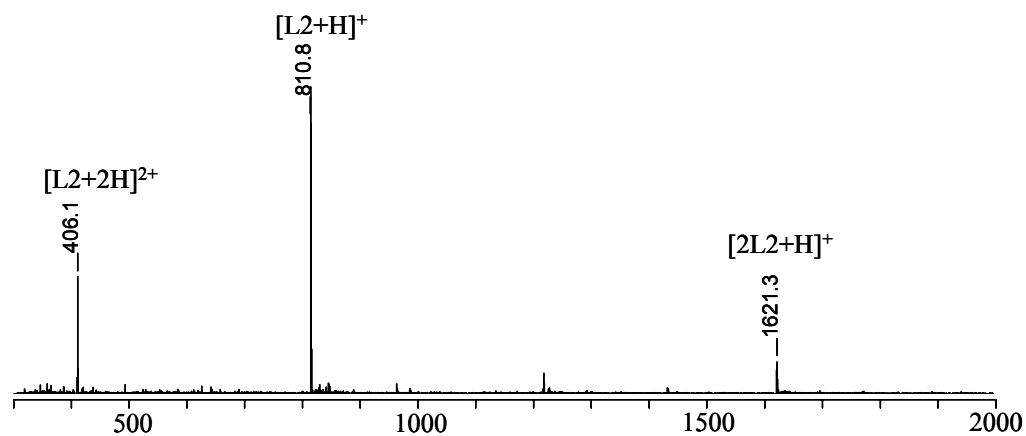

b) La:Zn:L2 = 1:1:3

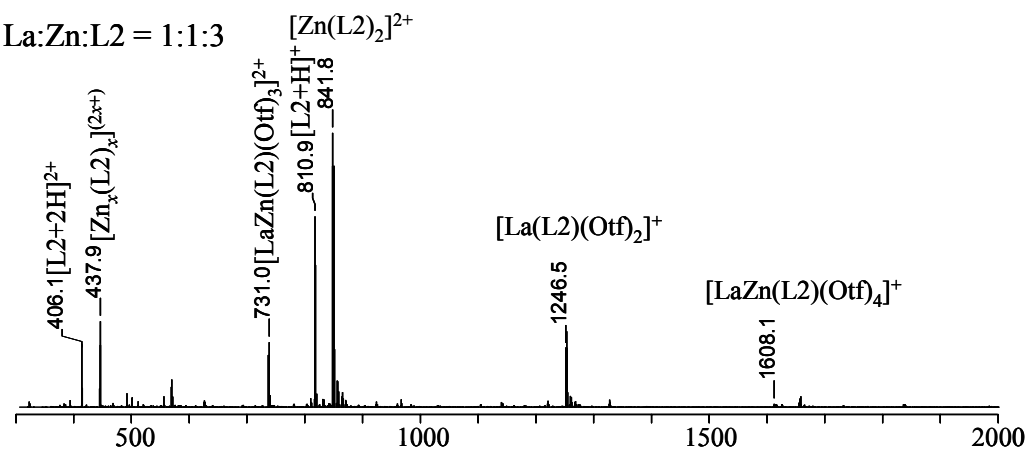

c) La:Zn:L2 = 1:2:3

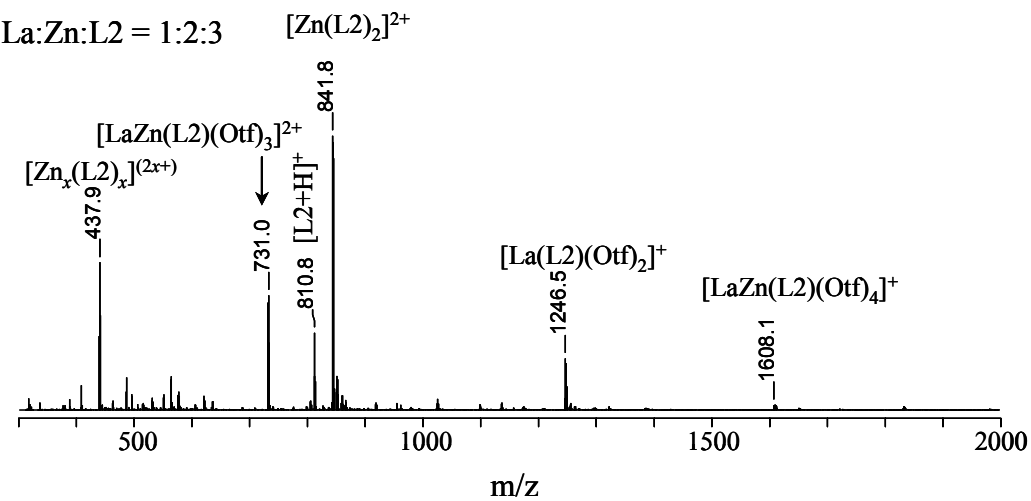

Figure S1 ESI-MS titration of L2 with  $La(CF_3SO_3)_3 \cdot 3H_2O$  and  $Zn(CF_3SO_3)_2 \cdot 6H_2O$  in  $CHCl_3:CH_3CN = 1:1$  (total ligand concentration  $2 \cdot 10^{-4} \text{ mol} \cdot \text{dm}^{-3}$ ).

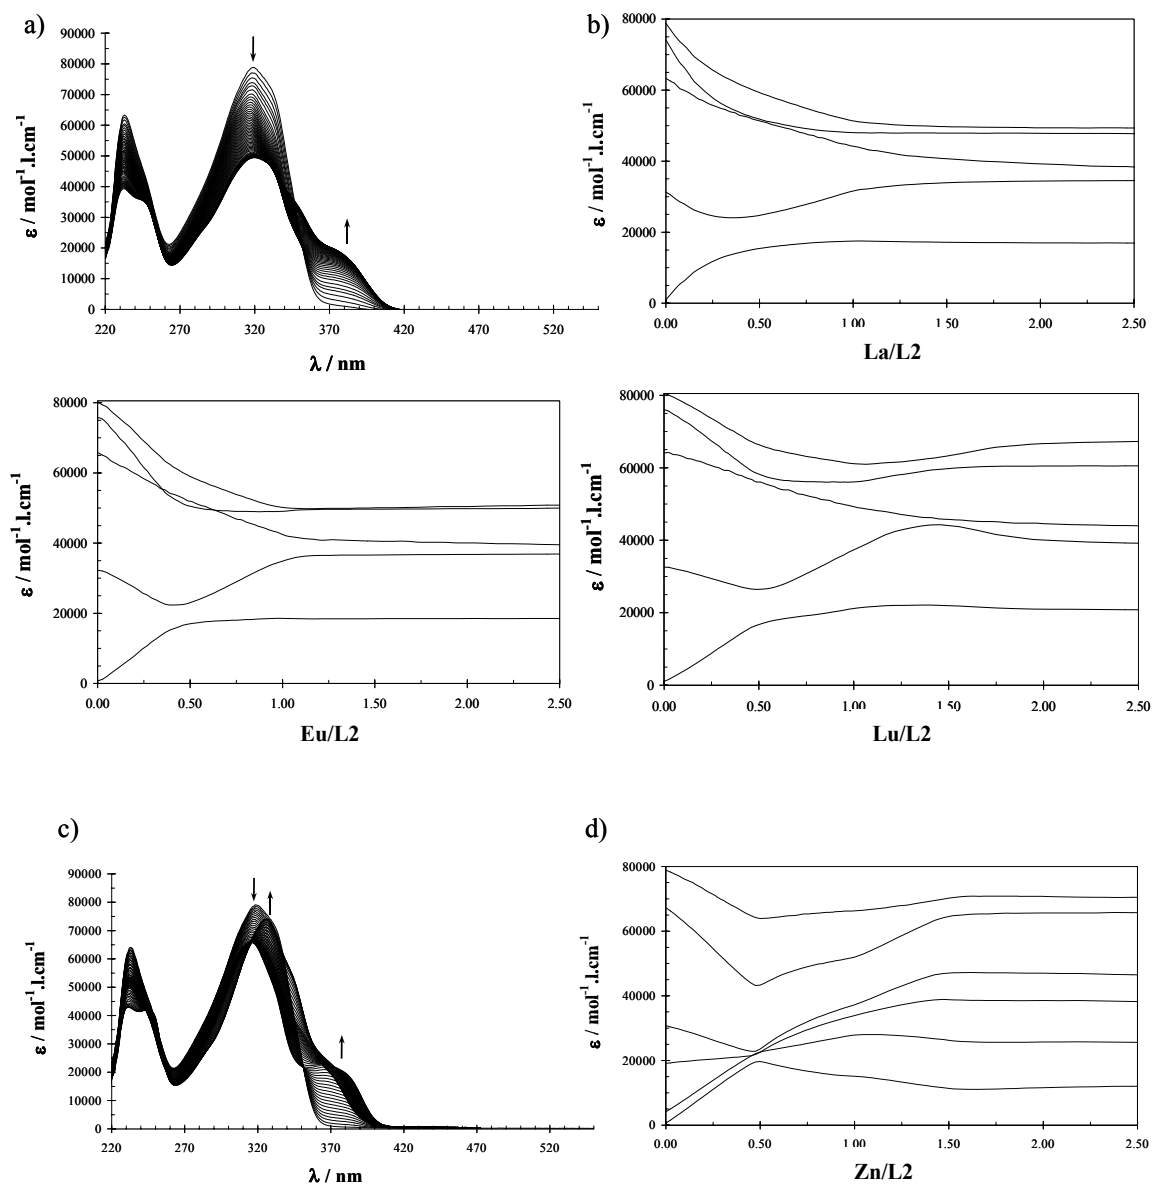

Figure S2 a) Variation of absorption spectra observed for the spectrophotometric titration of L2 (total ligand concentration:  $2 \cdot 10^{-4}$  mol·dm<sup>-3</sup>) with Ln(CF<sub>3</sub>SO<sub>3</sub>)<sub>3</sub>·*n*H<sub>2</sub>O at 293 K in CHCl<sub>3</sub>:CH<sub>3</sub>CN = 1:1 (*n* = 2-3, Ln = La, Eu, Lu, Ln:L2 = 0.1-2.5). b) Corresponding variation of observed molar extinctions at five different wavelengths. c) Variation of absorption spectra observed for the spectrophotometric titration of L2 (total ligand concentration:  $2 \cdot 10^{-4}$  mol·dm<sup>-3</sup>) with Zn(CF<sub>3</sub>SO<sub>3</sub>)<sub>2</sub>·6H<sub>2</sub>O at 293 K in CHCl<sub>3</sub>:CH<sub>3</sub>CN = 1:1 (Zn:L2 = 0.1-2.5). b) Corresponding variation of observed molar extinctions at six different wavelengths.



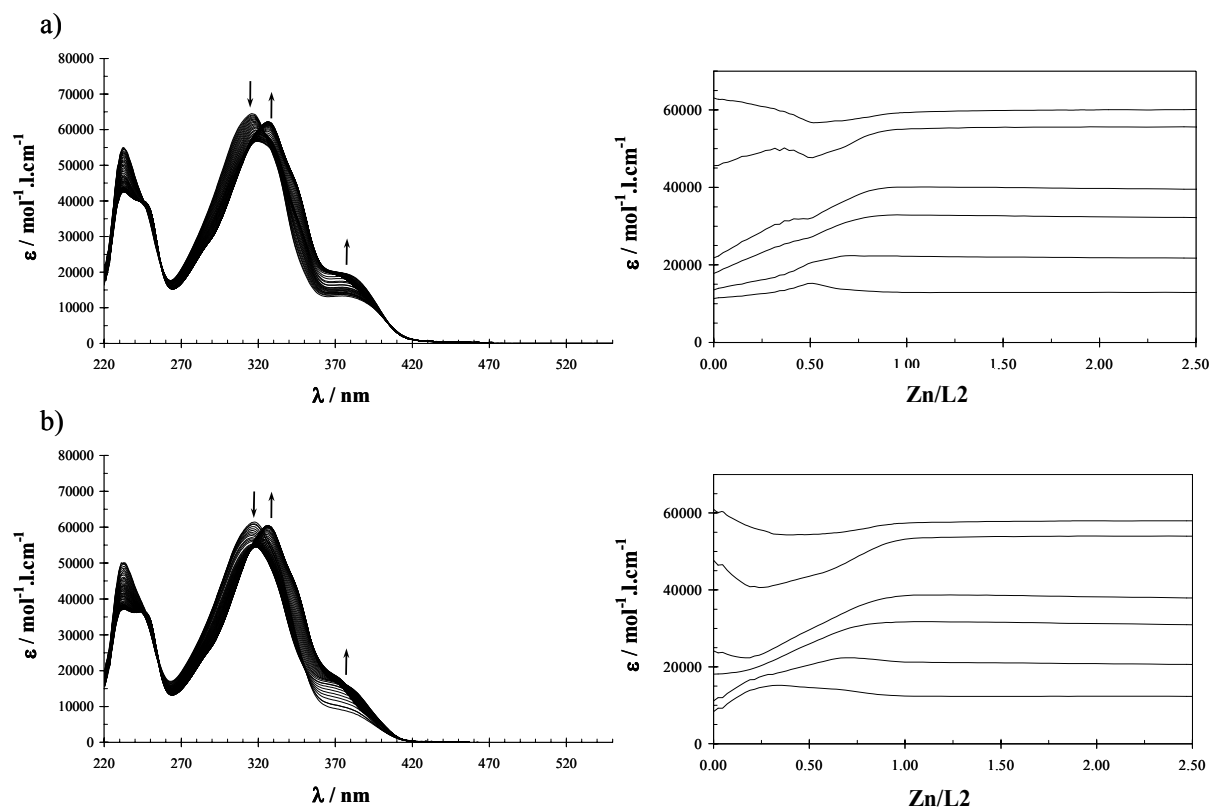

Figure S3 a) Variation of absorption spectra observed for the spectrophotometric titration of  $[\text{Eu}(\text{L}2)_3]^{3+}$  (total ligand concentration:  $2 \cdot 10^{-4} \text{ mol} \cdot \text{dm}^{-3}$ ) with  $\text{Zn}(\text{CF}_3\text{SO}_3)_2 \cdot 6\text{H}_2\text{O}$  at 293 K in  $\text{CHCl}_3:\text{CH}_3\text{CN} = 1:1$  ( $\text{Zn}:\text{L}2 = 0.1\text{-}2.5$ ) and corresponding variation of observed molar extinctions at six different wavelengths. b) Variation of absorption spectra observed for the spectrophotometric titration of  $[\text{Lu}(\text{L}2)_3]^{3+}$  (total ligand concentration:  $2 \cdot 10^{-4} \text{ mol} \cdot \text{dm}^{-3}$ ) with  $\text{Zn}(\text{CF}_3\text{SO}_3)_2 \cdot 6\text{H}_2\text{O}$  at 293 K in  $\text{CHCl}_3:\text{CH}_3\text{CN} = 1:1$  ( $\text{Zn}:\text{L}2 = 0.1\text{-}2.5$ ) and corresponding variation of observed molar extinctions at six different wavelengths.

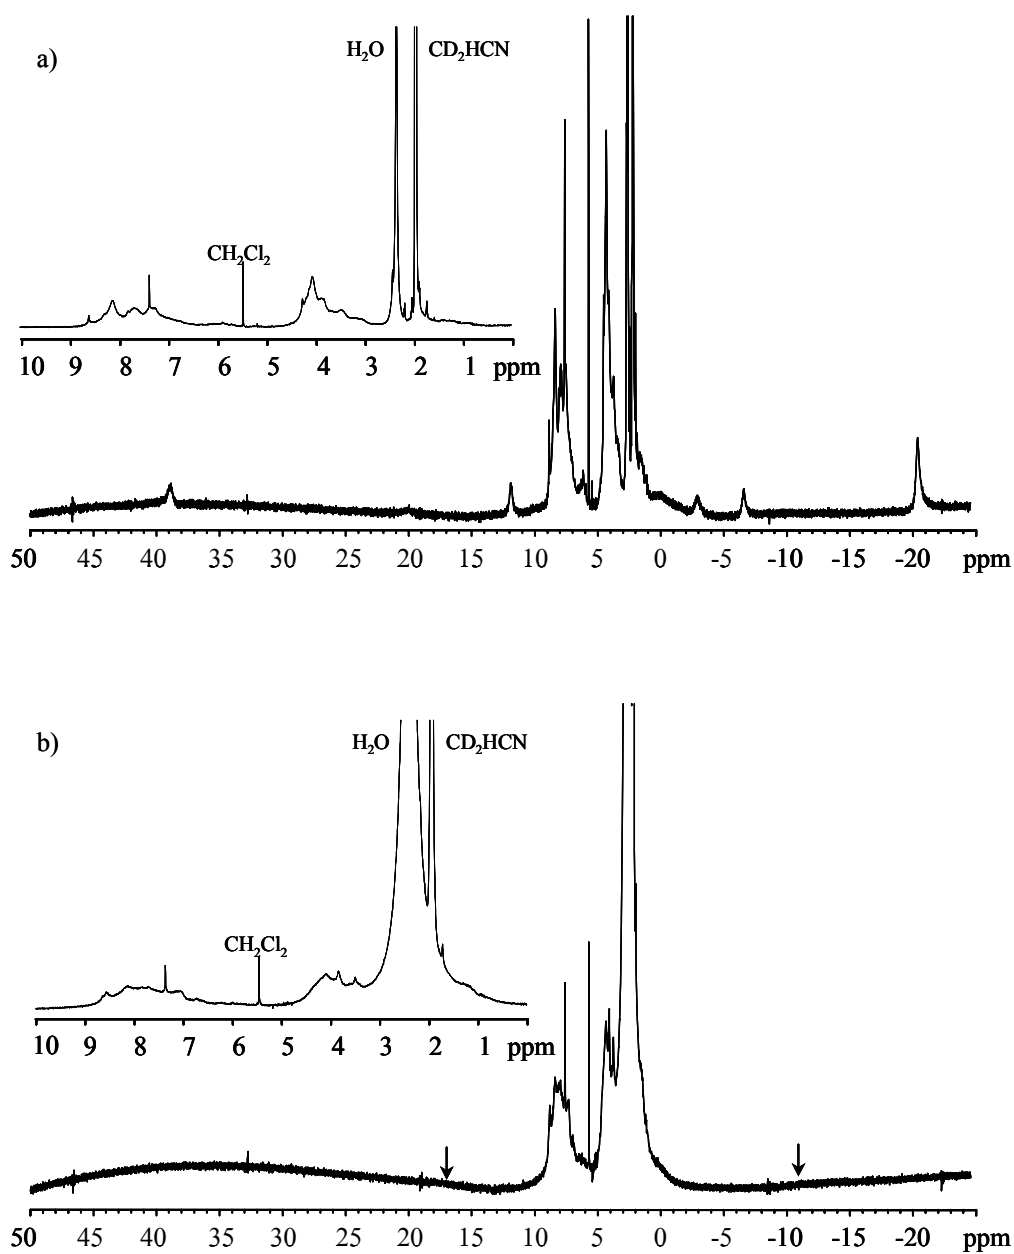

Figure S4  $^1\text{H}$  NMR spectra of a)  $[\text{Cr}^{\text{II}}\text{LaCr}^{\text{II}}(\text{L}2)_3]^{7+}$  and b)  $[\text{Cr}^{\text{III}}\text{LaCr}^{\text{III}}(\text{L}2)_3]^{9+}$  in  $\text{CD}_3\text{CN}$  at 243 K (total ligand concentration:  $2 \cdot 10^{-3} \text{ mol} \cdot \text{dm}^{-3}$ ).

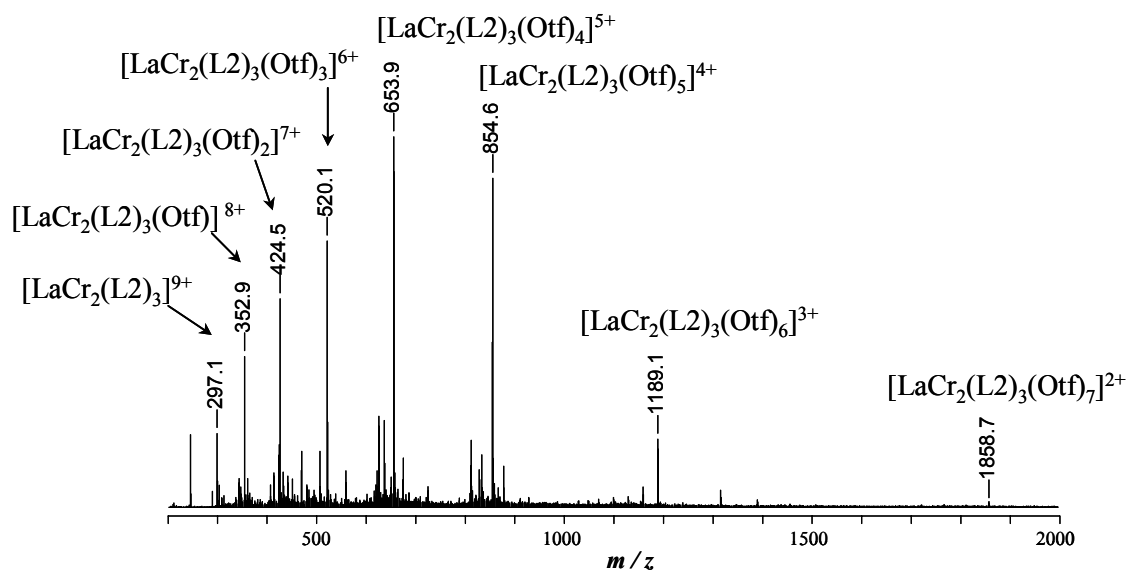

Figure S5 ESI-MS spectrum of  $[CrLaCr(L_2)_3]^{9+}$  in acetonitrile (total ligand concentration:  $3 \cdot 10^{-4}$  mol·dm<sup>-3</sup>).

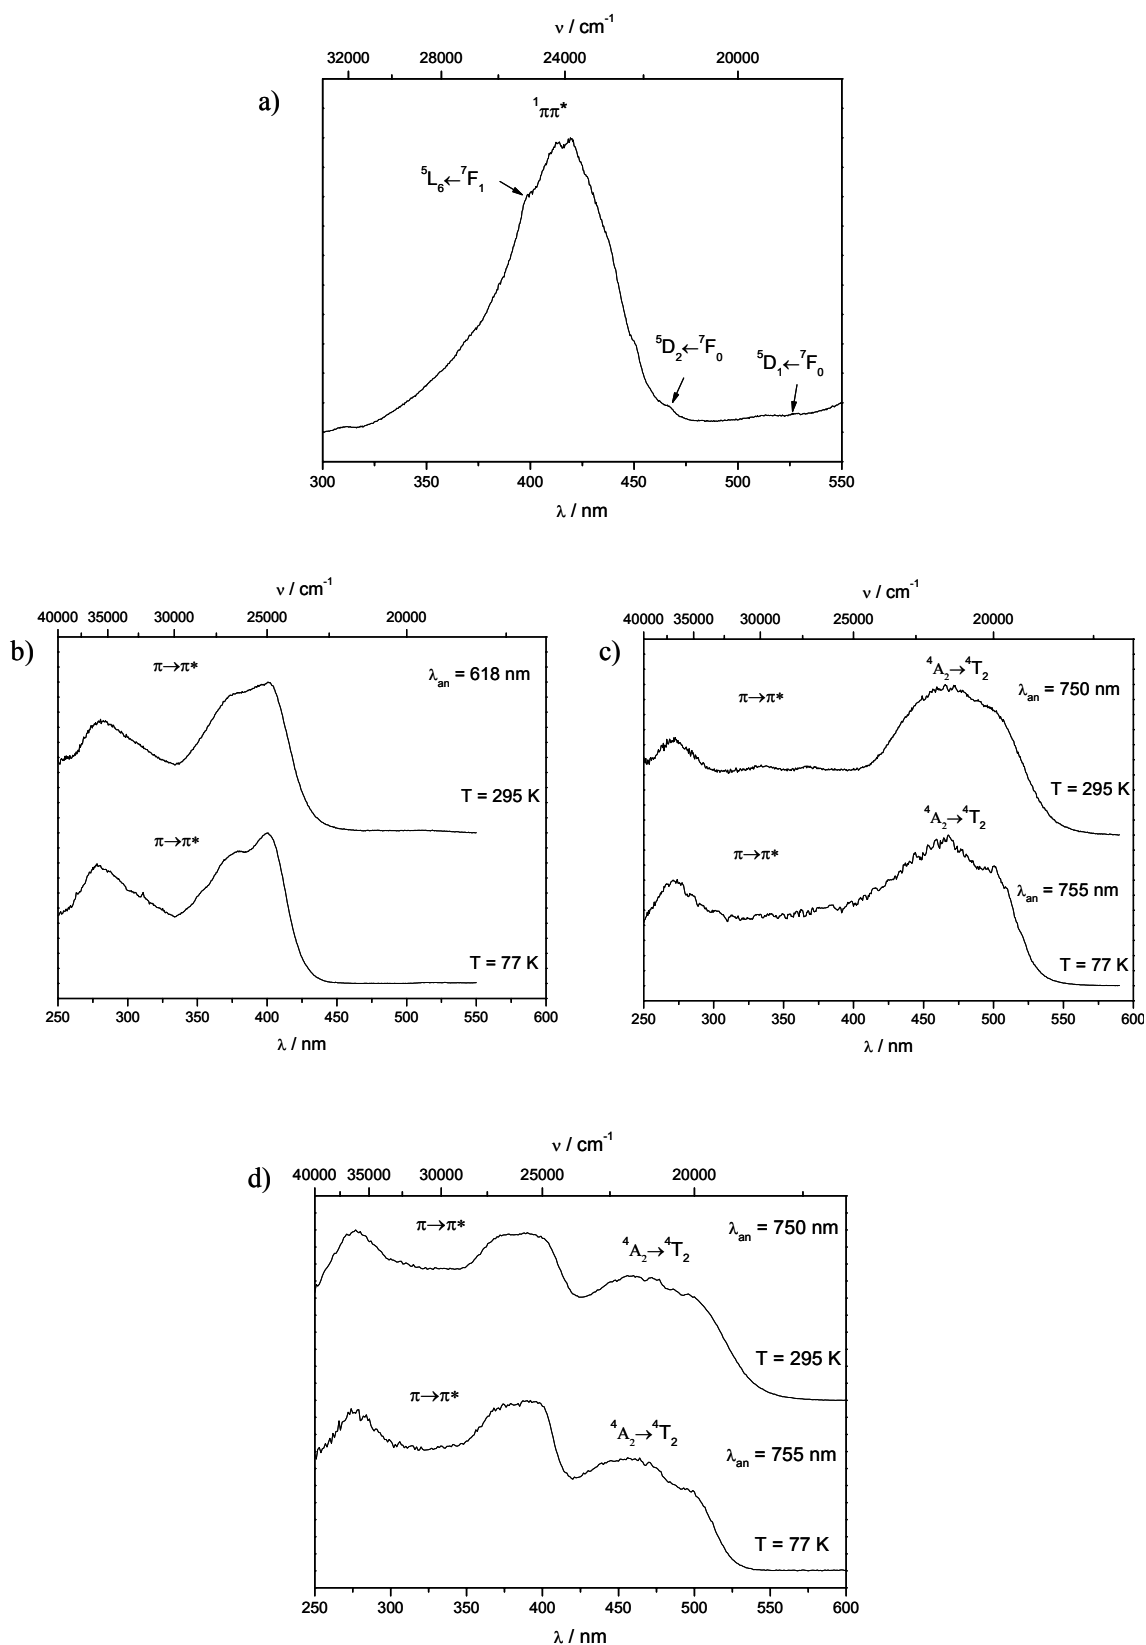

Figure S6 Excitation spectra of a)  $[\text{ZnEuZn}(\text{L}2)_3](\text{CF}_3\text{SO}_3)_7$  upon monitoring  $\text{Eu}({}^5\text{D}_0 \rightarrow {}^7\text{F}_2)$  at 10K, b)  $[\text{CrEuCr}(\text{L}2)_3](\text{CF}_3\text{SO}_3)_9$  upon monitoring  $\text{Eu}({}^5\text{D}_0 \rightarrow {}^7\text{F}_2)$  at 77K and 295K, c)  $[\text{CrEuCr}(\text{L}2)_3](\text{CF}_3\text{SO}_3)_9$  upon monitoring  $\text{Cr}({}^2\text{E} \rightarrow {}^4\text{A}_2)$  at 77K and 295K and d)  $[\text{CrGdCr}(\text{L}2)_3](\text{CF}_3\text{SO}_3)_9$  upon monitoring  $\text{Cr}({}^2\text{E} \rightarrow {}^4\text{A}_2)$  at 77K and 295K.

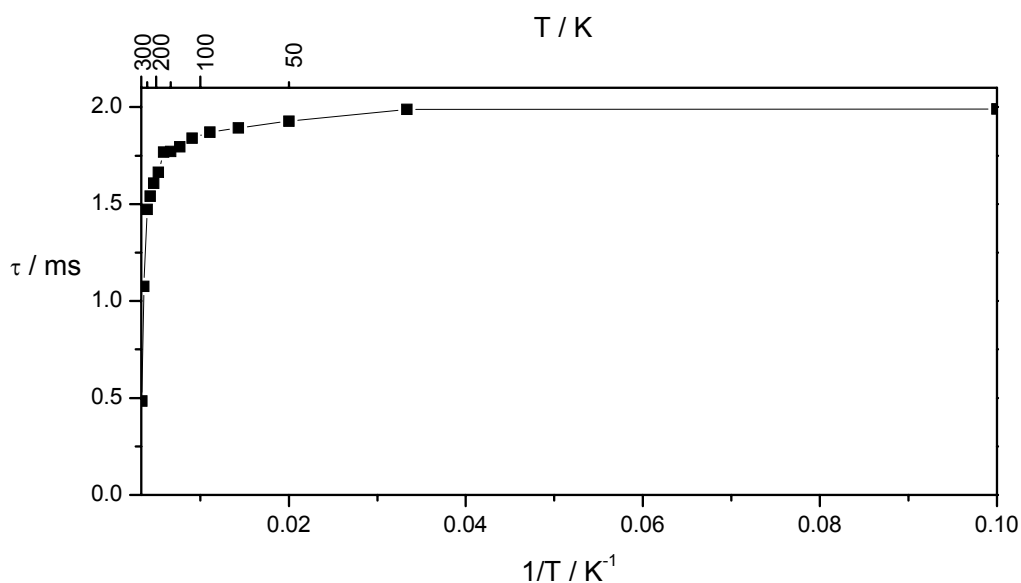

Figure S7 Variation of  $\text{Eu}(^5\text{D}_0)$  lifetime with respect to the temperature for  $[\text{ZnEuZn}(\text{L}2)_3](\text{CF}_3\text{SO}_3)_7$  ( $\bar{\nu}_{\text{exc}} = 24390 \text{ cm}^{-1}$ ).

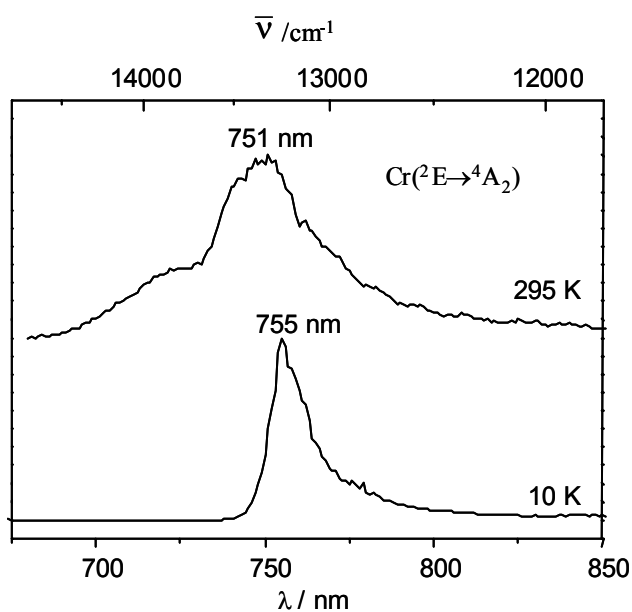

Figure S8 Emission spectra of  $[\text{CrGdCr}(\text{L}2)_3](\text{CF}_3\text{SO}_3)_9$  at 10 and 295 K ( $\bar{\nu}_{\text{exc}} = 28170 \text{ cm}^{-1}$ ).
